# Supplementary material for: ctDNA Concentration, MIKI67 Mutations and Hyper-Progressive Disease Related Gene Mutations Are Prognostic Markers for Camrelizumab and Apatinib Combined Multiline Treatment in Advanced NSCLC
Source: Front Oncol. 2020 Sep 4;10:1706. doi: 10.3389/fonc.2020.01706 (PMC7509428; doi:10.3389/fonc.2020.01706)
Supplement: Supplementary file 5 [file Table_3.xlsx]

## Sheet: Sheet1
Supplementary Table 3. The subtype, PFS, ctDNA concentration, TMB, PD-L1 expression, VEGF mutation, therapy and response information for all patinets involved in this study
ID	Subtype	PFS(months)	cfDNA_conc (ng/dl)	TMB	PD-L1 Expression	VEGF mutations	Response	Previous therapy	present therapy
1	ADC	1.8	1.61	6.96	<1%	WT	PD	1st-line and 2nd-line chemotherapy	3rd line immunotherapy
2	ADC	1.9	0.288	6.96	0.6	VEGFA c.G215A	PD	1st-line chemotherapy and 2nd-line TKI therapy	3rd line immunotherapy
3	ADC	3	1.09	2.61	N/A	WT	PD	3rd-line chemotherapy,4th and 5th-line TKI therapy	6th line immunotherapy
4	ADC	4.56	0.496	5.22	<1%	WT	PD	TKI and chemotherapy	2nd line immunotherapy
5	ADC	4.6	0.53	0.87	0.1	WT	PD	1st-line chemotherapy	2nd line immunotherapy
6	ADC	6.33	0.378	0	N/A	WT	SD	1st-line TKI and chemotherapy	2nd line immunotherapy
7	ADC	10.5	0.257	0	N/A	WT	PR	1st-line chemotherapy and 2nd-line targeted therapy	3rd line immunotherapy
8	ADC	12	0.198	0	0.05	WT	SD	1st-line and 2nd-line chemotherapy	3nd line immunotherapy
9	ADC	12	0.172	0	N/A	WT	SD	1st-line and 2nd-line TKI and chemotherapy	3rd line immunotherapy
10	ADC	15.5	0.152	0	0.6	WT	PR	1st-line chemotherapy	2nd line immunotherapy
11	SCC	1.4	0.596	9.57	0.1	WT	PD	1st-line chemoradiotherapy, 2nd-line chemotherapy	3rd line immunotherapy
12	SCC	1.6	0.55	5.22	0.05	WT	PD	1st-line chemotherapy	2nd line immunotherapy
13	SCC	2	0.668	0	N/A	WT	SD	surgery+chemoradiotherapy	2nd line immunotherapy
14	SCC	2.2	0.318	6.09	<1%	WT	PD	1st-line chemotherapy	2nd line immunotherapy
15	SCC	3	0.158	6.96	0.5	WT	PD	1st-line chemoradiotherapy	2nd line immunotherapy
16	SCC	5	1.03	9.57	N/A	WT	SD	1st-line chemotherapy	2nd line immunotherapy
17	SCC	5.53	0.254	0.87	0.2	WT	SD	1st-line chemotherapy	2nd line immunotherapy
18	SCC	7	0.122	7.83	<1%	WT	SD	1st-line chemotherapy,2nd and 3rd-line targeted therapy	4th line immunotherapy
19	SCC	8.9	0.278	2.61	0.15	WT	SD	1st line chemoradiotherapy	2nd line immunotherapy
20	SCC	11	0.616	0	0.5	WT	PR	surgery+chemoradiotherapy	2nd line immunotherapy
21	SCC	12	0.334	6.96	0.1	WT	PR	surgery+chemotherapy	2nd line immunotherapy
22	SCC	12	0.722	6.96	N/A	WT	PR	surgery+chemoradiotherapy	2nd line immunotherapy
PFS=progression-free survival; ctDNA=circulating tumor DNA; TMB=tumor mutational burden; ADC=adenocarcinoma; SCC=squamous cell carcinoma; PD=progressed disease; PR=partial response; SD=stable disease; TKI=tyrosine kinase inhibitor
